# Supplementary material
Source: PubMed Central journal article supplement (PMC8086234)
Supplement: NIHMS1693247-supplement-SI.pdf [file NIHMS1693247-supplement-SI.pdf]

## Supporting Information

### **The Unique Potency of Cowpea Mosaic Virus (CPMV) *In Situ* Cancer Vaccine**

Sourabh Shukla,<sup>1</sup> Chao Wang,<sup>1#</sup> Veronique Beiss,<sup>1</sup> Hui Cai,<sup>1</sup> Torus Washington,<sup>1</sup> Abner A. Murray,<sup>2</sup> Xingjian Gong,<sup>3</sup> Zhongchao Zhao,<sup>4</sup> Hema Masarapu,<sup>5</sup> Adam Zlotnick,<sup>4</sup> Steven Fiering<sup>6</sup> and Nicole F. Steinmetz.<sup>1,7,8,9,10</sup>

<sup>1</sup>Department of NanoEngineering, <sup>7</sup>Department of Bioengineering, <sup>8</sup>Department of Radiology, <sup>9</sup>Moore's Cancer Center, <sup>10</sup>Center for Nano-ImmunoEngineering, University of California-San Diego, La Jolla CA 92039, USA; <sup>2</sup>Department of Molecular Biology and Microbiology, <sup>3</sup>Department of Bioengineering, Case Western Reserve University, Cleveland OH 44106; <sup>4</sup>Molecular and Cellular Biochemistry Department, Indiana University Bloomington IN 47405; <sup>5</sup>Department of Virology, Sri Venkateswara University, Tirupati 517502, India; <sup>6</sup>Geisel School of Medicine, Dartmouth College, Lebanon, NH 03756.

# Current address: MD Anderson Cancer Center, Houston TX 77030

Correspondence: [nsteinmetz@ucsd.edu](mailto:nsteinmetz@ucsd.edu)

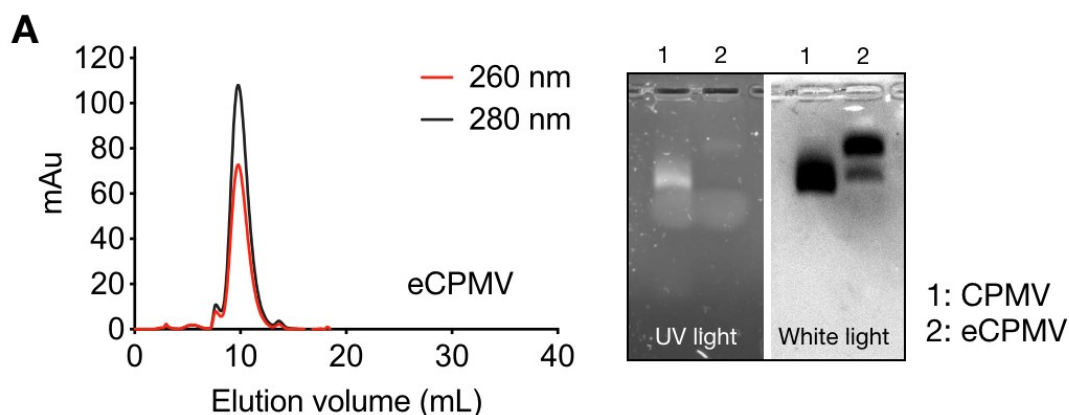

**Figure S1: Characterization of eCPMV:** (A, B) eCPMV was characterized by size exclusion chromatography using a Superose 6 column and native gel electrophoresis (1.2% (w/v) agarose in TBE buffer). The inverted 260:280 ratios (<1, compared to RNA-containing CPMV) confirmed absence of encapsidated nucleic acid; this was corroborated by lack of nucleic staining and reduced electrophoretic mobility of the eCPMV.

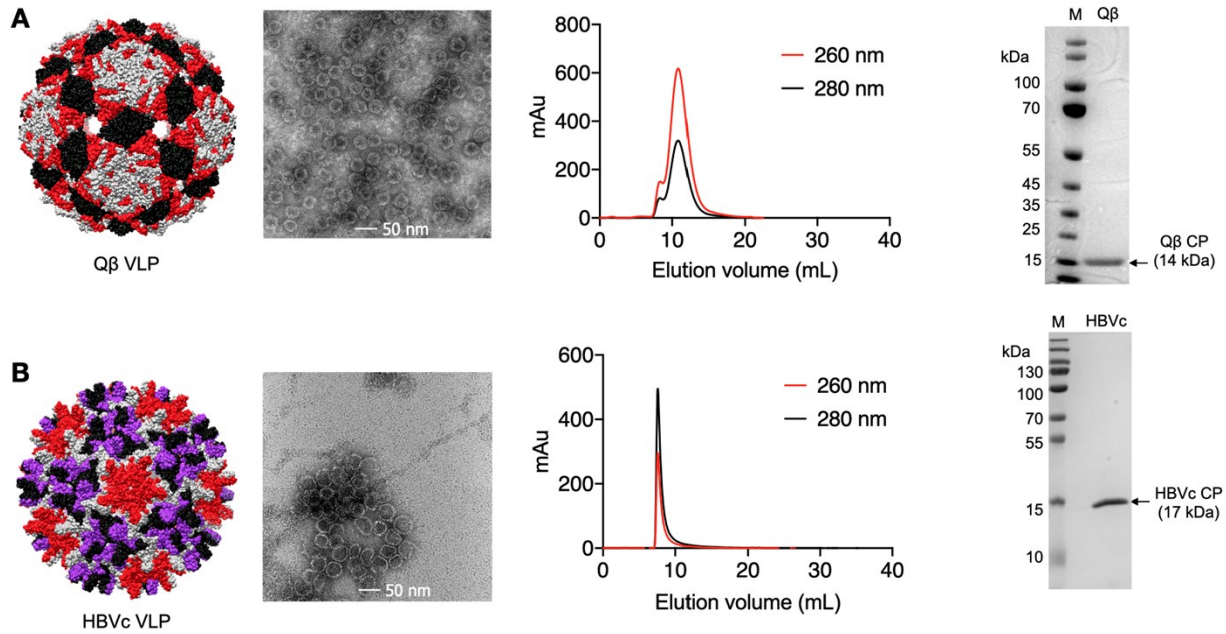

**Figure S2: Characterization of Q $\beta$  and HBVc VLPs:** Q $\beta$  and HBVc VLPs were analyzed by transmission electron microscopy (TEM), size exclusion chromatography (SEC) using a Superose 6 column and SDS-PAGE (using a 12% Nu-PAGE gel). TEM and SEC data indicate intact VLPs and SDS-PAGE showed the coat proteins; 14 kDa for Q $\beta$  and 17 kDa for the HBVc.

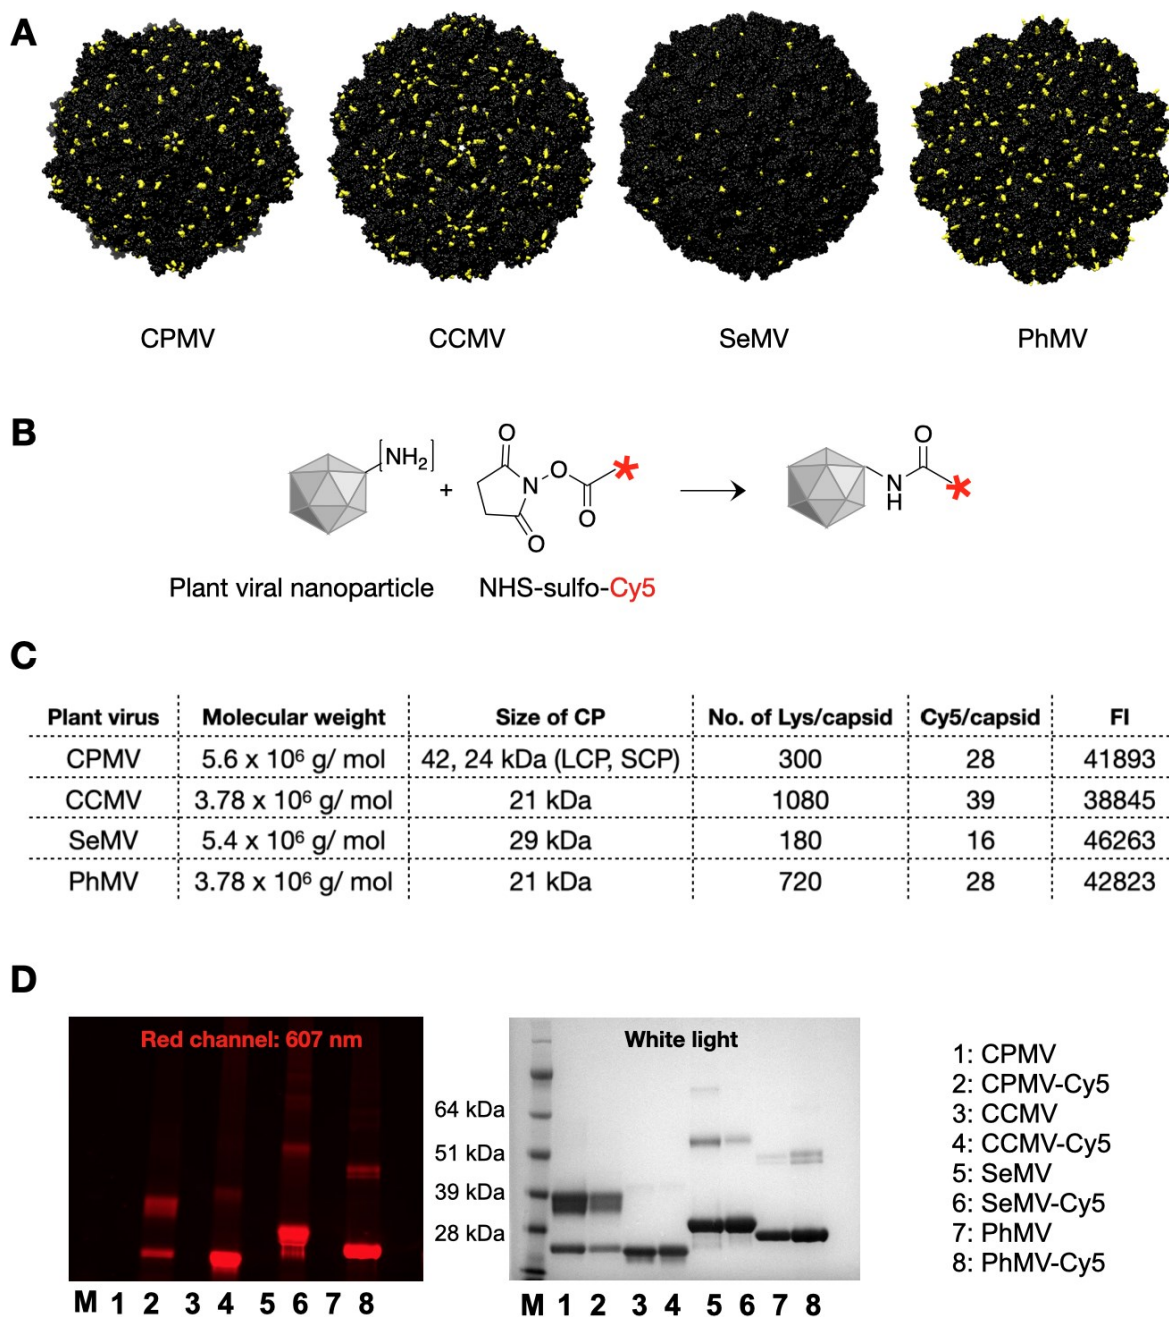

**Figure S3: Synthesis and characterization of fluorescent plant viral nanoparticles:** Cy5-labeled viral nanoparticles were synthesized by conjugating NHS-sulfo-Cy5 to the solvent exposed Lys residues on viral capsids (A, B). All four particles offer variable number of reactive Lys residues; therefore the conjugation protocols were carefully adjusted yielding fluorescent viral particles with comparable fluorescence intensities (FI, C). The FI of the Cy-labeled viral nanoparticles measured using a particle concentration of 0.1mg/ mL and 635/655 excitation/emission. (D) SDS-PAGE confirmed presence of fluorescent coat proteins (D).

**A Innate Panel**

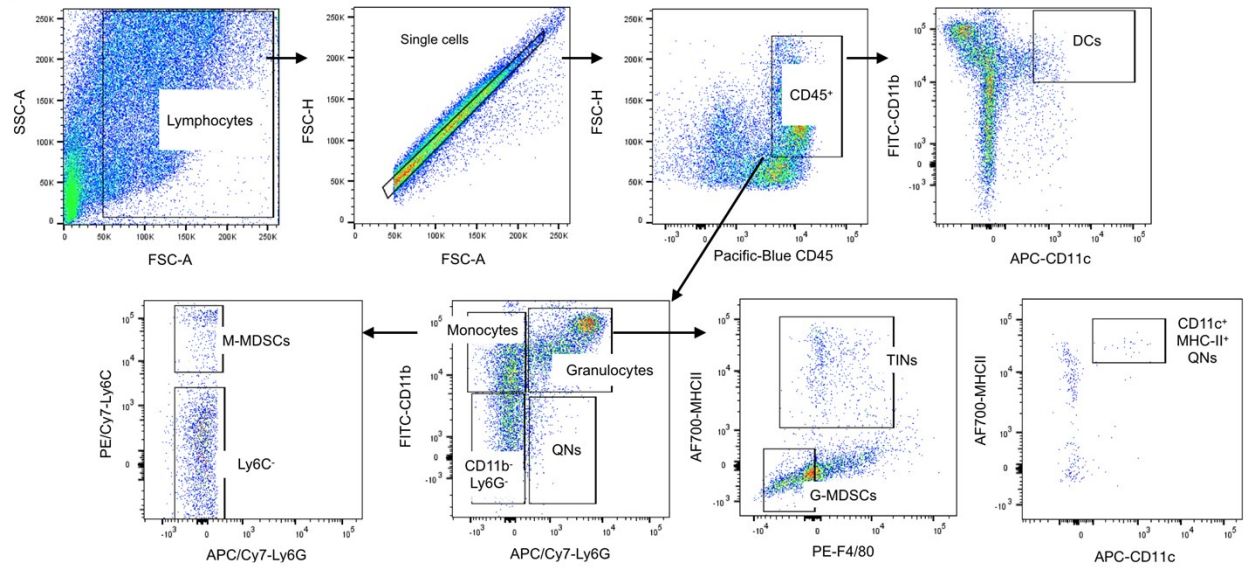

**B Adaptive Panel**

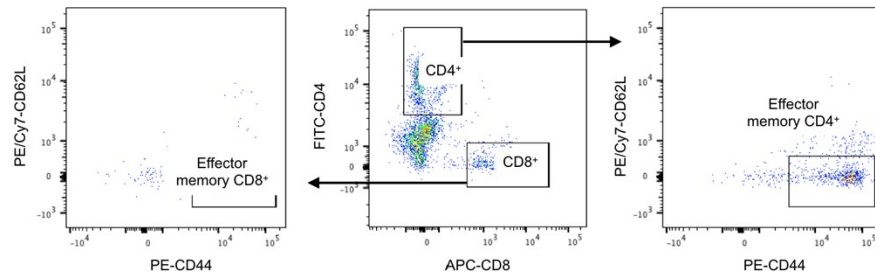

**Figure S4:** Gating strategy used for characterization of the immune response in the IP wash from ID8-Defb29/Vegf-a ovarian tumor bearing mice following treatment with CPMV, CCMV, SeMV and PhMV-VLP *in situ* vaccine.

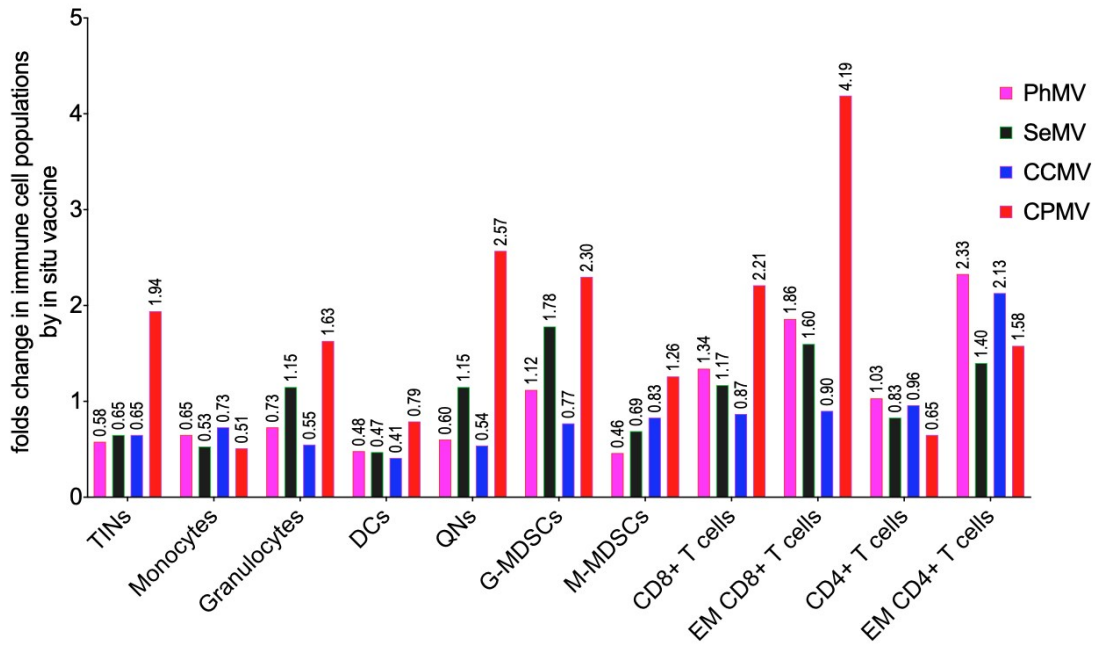

**Figure S5:** Comparative changes in the immune cell population of intraperitoneal tumor microenvironment by in situ vaccine using different VNPs.

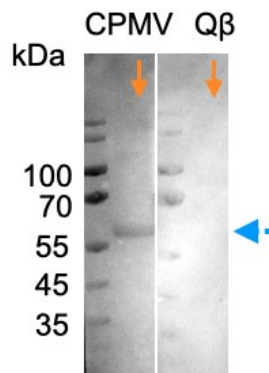

**Figure S6:** VOPBA assay comparing vimentin binding of CPMV and Q $\beta$  VLP.
